# Supplementary material for: Epigenetic Control of circHNRNPH1 in Postischemic Myocardial Fibrosis through Targeting of TGF-β Receptor Type I
Source: PubMed Central journal article supplement — Mol Ther Nucleic Acids. 2020 Aug 19;25:93–104. doi: 10.1016/j.omtn.2020.08.008 (PMC8250456; doi:10.1016/j.omtn.2020.08.008), 2020-08-19
Supplement: mmc1.pdf [file mmc1.pdf]

OMTN, Volume 25

**Supplemental information**

**Epigenetic Control of circHNRNPH1  
in Postischemic Myocardial Fibrosis  
through Targeting of TGF- $\beta$  Receptor Type I**

**Weifeng Li, Yue Wang, Yunfei Deng, Huaner Ni, Gu Shen, Xiaoqiang Liu, Jun Li, and Fang Wang**

OMTN, Volume ■ ■ ■

## **Supplemental Information**

### **Epigenetic Control of circHNRNPH1 in Postischemic Myocardial Fibrosis through Targeting of TGF- $\beta$ Receptor Type I**

**Weifeng Li, Yue Wang, Yunfei Deng, Huaner Ni, Gu Shen, Xiaoqiang Liu, Jun Li, and Fang Wang**

## Supplemental Figures

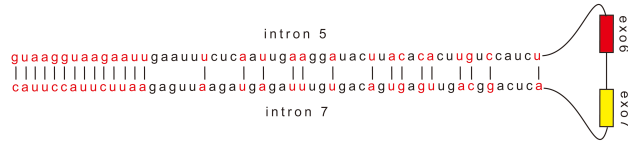

Figure S1 The diagram of the flanking introns of exon 6 and exon 7 in HNRNPH1 mRNA

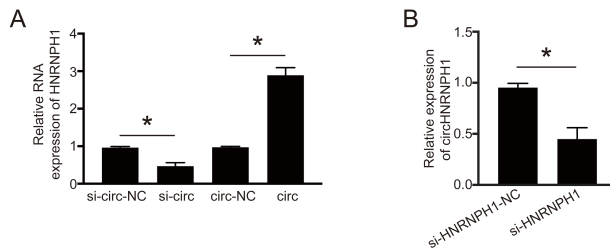

Figure S2 The reciprocal effect between circHNRNPH1 and mRNA-HNRNPH1

(A) circHNRNPH1 expression decreased with knockdown of mRNA-HNRNPH1. Data are presented as the mean  $\pm$  SD, (n=3 per group, \*p < 0.05)

(B) mRNA-HNRNPH1 expression validation by Quantitative PCR examination.

Knockdown of circHNRNPH1 decreased mRNA-HNRNPH1 expression, in opposite to circHNRNPH1 overexpression. Data are presented as the mean  $\pm$  SD, (n=3 per group, \*p < 0.05)

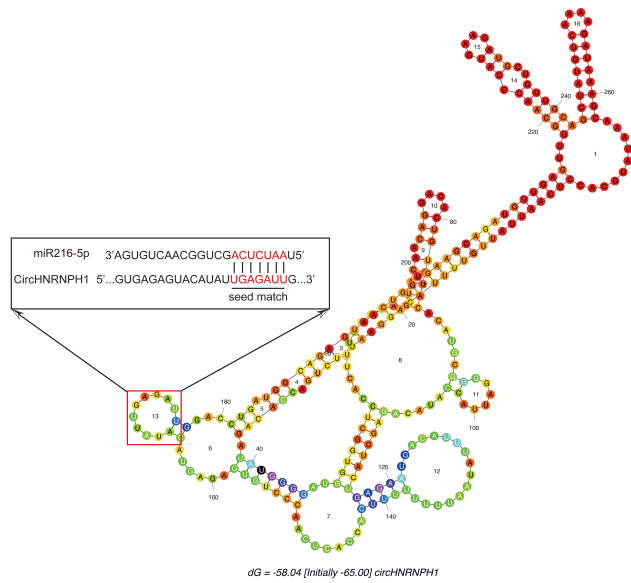

Figure S3 Prediction of binding site of circHNRNPH1 to miR216-5p

The stable second structure of circHNRNPH1 and the site of circHNRNPH1 interacting with miR216-5p

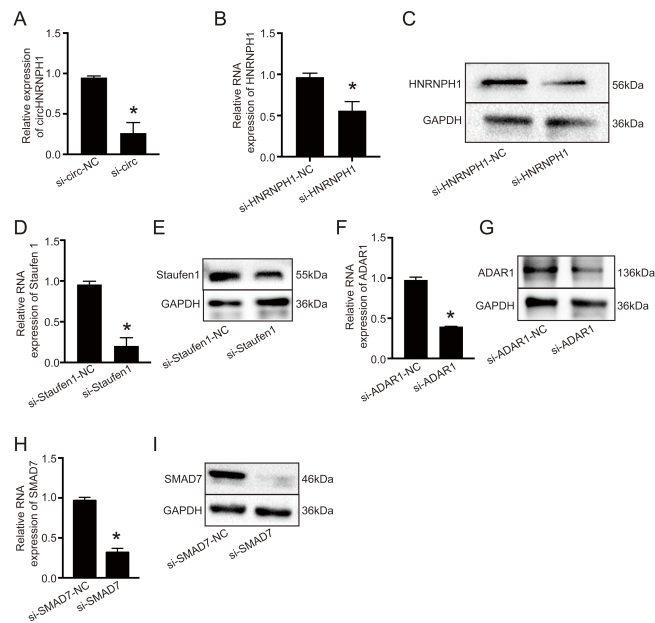

Figure S4 The siRNAs effective analysis of circHNRNPH1(A), HNRNPH1(B-C), Staufen1(D-E), ADAR1(F-G) and SMAD7(H-I) by quantitative PCR and western blots. Data are presented as the mean  $\pm$  SD, (n=3 per group, \*p < 0.05)
